# Supplementary figures and images for: Comparison of birth weight between school health records and medical birth records in Denmark: determinants of discrepancies
Source: HighWire-hosted journal article supplement (doi:10.1136/bmjopen-2015-008628), 2015-11-01

Figure S1.

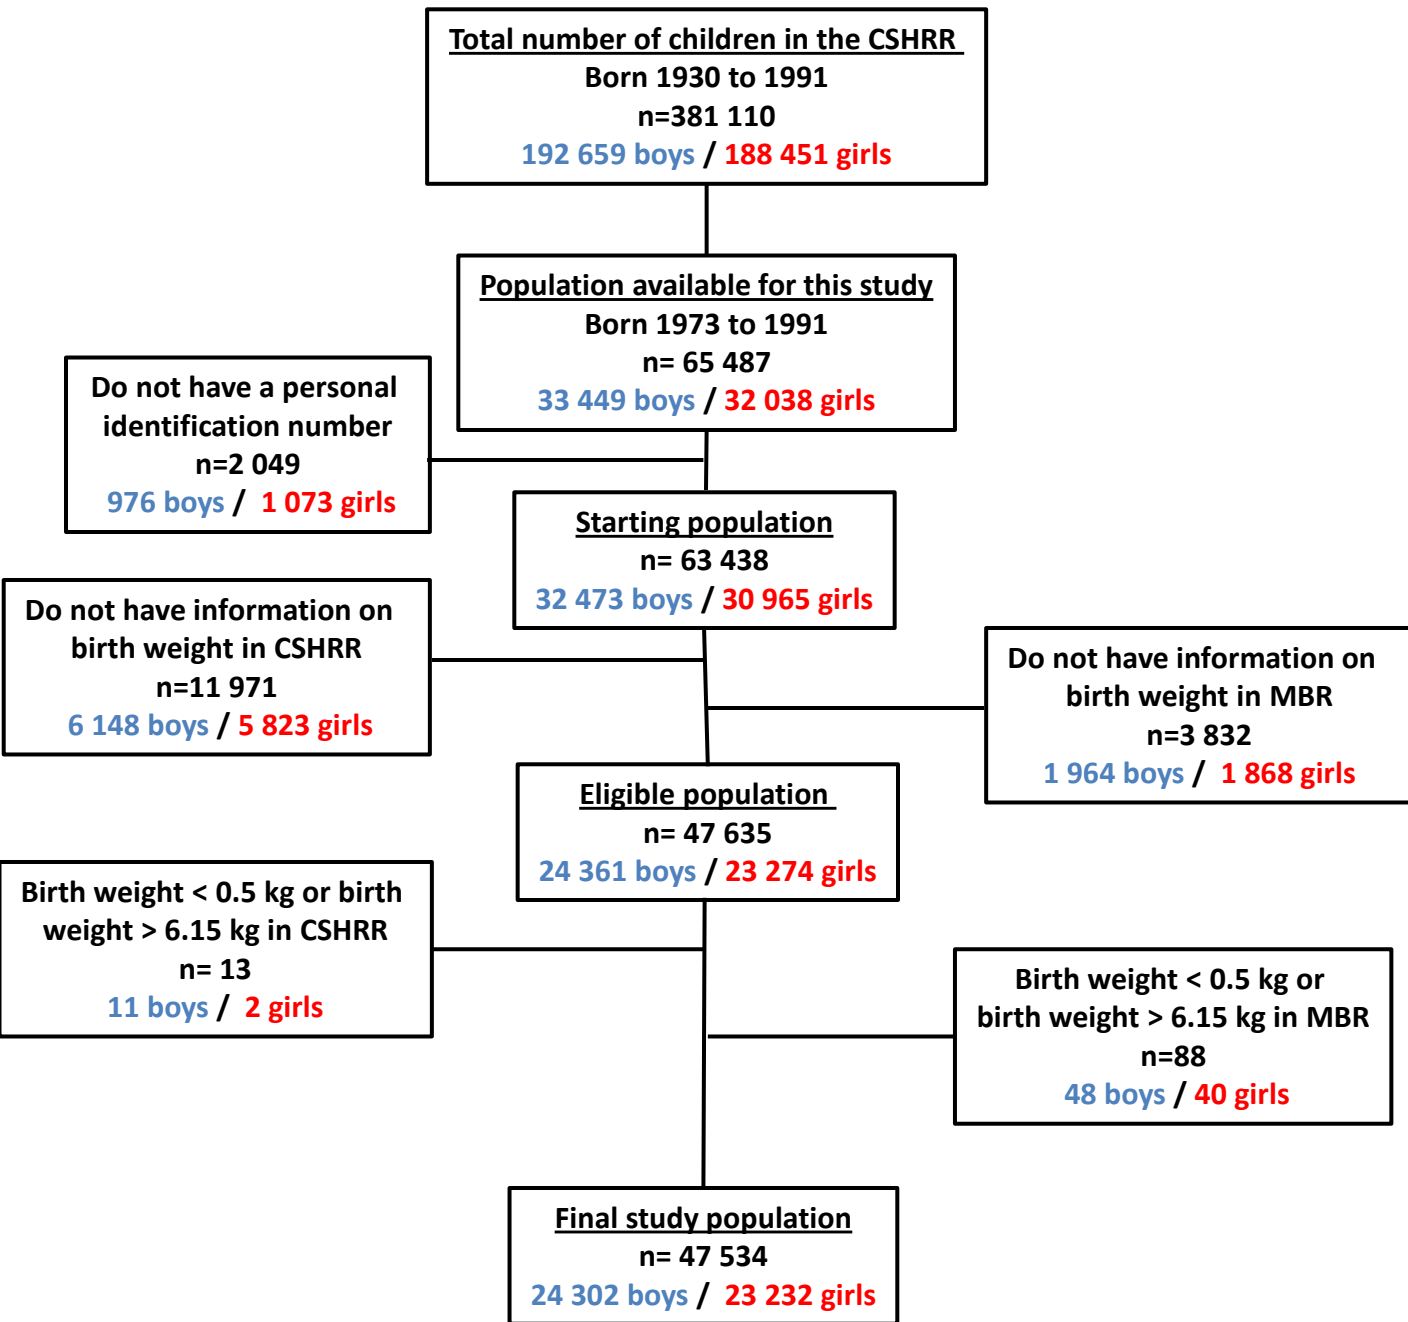

Supplement: bmjopen-2015-008628supp_figure1.pdf [file bmjopen-2015-008628supp_figure1.pdf]
